# Supplementary material
Source: publisher site journal article supplement (https://www.degruyterbrill.com/publication/dbid/dbe/downloadAsset/DBE_DBE_Abkuerzungsverzeichnis.pdf)
Supplement: Supplementary file 1 [file DBE_DBE_Abkuerzungsverzeichnis.pdf]

---

## Abkürzungsverzeichnis

|             |                                               |          |                                                |
|-------------|-----------------------------------------------|----------|------------------------------------------------|
| Abt.        | Abteilung                                     | Faks.    | Faksimile                                      |
| a. d.       | an dem, an der, auf der                       | FDP      | Freie Demokratische Partei                     |
| AG          | Aktiengesellschaft                            | Frfr.    | Freifrau                                       |
| a. o. Prof. | außerordentlicher Professor                   | Frh.     | Freiherr                                       |
| apl. Prof.  | außerplanmäßiger Professor                    | frz.     | französisch                                    |
| a. St.      | alter Stil                                    | geb.     | geboren(e)                                     |
| AT          | Altes Testament                               | Gem.     | Gemeinde                                       |
| Aufl.       | Auflage                                       | gest.    | gestorben                                      |
| Ausg.       | Ausgabe                                       | Gestapo  | Geheime Staatspolizei                          |
| b.          | bei                                           | Gf.      | Graf                                           |
| BBC         | British Broadcasting Corporation              | GmbH     | Gesellschaft mit beschränkter Haftung          |
| Bd., Bde.   | Band, Bände                                   | H.       | Heft                                           |
| Bearb.      | Bearbeiter(in)                                | Habil.   | Habilitation                                   |
| bearb.      | bearbeitet                                    | h. c.    | honoris causa                                  |
| bes.        | besonders                                     | Hrsg.    | Herausgeber(in)                                |
| Bez.        | Bezirk                                        | hrsg.    | herausgegeben                                  |
| Bibliogr.   | Bibliographie                                 | Ing.     | Ingenieur                                      |
| Biogr.      | Biographie                                    | Jg.      | Jahrgang                                       |
| BRD         | Bundesrepublik Deutschland                    | Jh.      | Jahrhundert                                    |
| bzw.        | beziehungsweise                               | kath.    | katholisch                                     |
| ca.         | circa                                         | kgf.     | königlich                                      |
| CDU         | Christlich Demokratische Union                | k. k.    | kaiserlich-königlich                           |
| CSU         | Christlich-Soziale Union in Bayern            | KPD      | Kommunistische Partei Deutschlands             |
| Cty.        | County                                        | Kr.      | Kreis                                          |
| d. Ä.       | der (die) Ältere                              | Kt.      | Kanton                                         |
| dän.        | dänisch                                       | k. u. k. | kaiserlich und königlich                       |
| dass.       | dasselbe                                      | lat.     | lateinisch                                     |
| DDR         | Deutsche Demokratische Republik               | Lfg.     | Lieferung                                      |
| DEK         | Deutsche Evangelische Kirche                  | lic.     | licentiatus                                    |
| dems.       | demselben                                     | Lit.     | Literatur                                      |
| Dép.        | Département                                   | Ltd.     | Limited                                        |
| ders.       | derselbe                                      | luth.    | lutherisch                                     |
| d. Gr.      | der (die) Große                               | Nachdr.  | Nachdruck                                      |
| dies.       | dieselbe(n)                                   | n. e.    | nicht ermittelt                                |
| Diss.       | Dissertation                                  | Neudr.   | Neudruck                                       |
| d. J.       | der (die) Jüngere                             | N. F.    | Neue Folge                                     |
| dt.         | deutsch                                       | Nr.      | Nummer                                         |
| ebd.        | ebenda                                        | NSDAP    | Nationalsozialistische Deutsche Arbeiterpartei |
| ed.         | edited                                        | NT       | Neues Testament                                |
| e. h.       | ehrenhalber                                   | österr.  | österreichisch                                 |
| eigentl.    | eigentlich                                    | ÖVP      | Österreichische Volkspartei                    |
| EKD         | Evangelische Kirche in Deutschland            | o. J.    | ohne Jahr                                      |
| EKU         | Evangelische Kirche der Union                 | o. Prof. | ordentlicher Professor                         |
| engl.       | englisch                                      | preuß.   | preußisch                                      |
| erw.        | erweitert                                     | Prof.    | Professor(in)                                  |
| ETH         | Eidgenössische Technische Hochschule          | Prov.    | Provinz                                        |
| e. V.       | eingetragener Verein                          | Pseud.   | Pseudonym                                      |
| evang.      | evangelisch                                   |          |                                                |
| f., ff.     | folgende Seite(n), folgendes (folgende) Jahre |          |                                                |

## Abkürzungsverzeichnis

---

|            |                                            |         |                                                     |
|------------|--------------------------------------------|---------|-----------------------------------------------------|
| Red.       | Redaktion                                  | TU      | Technische Universität                              |
| rev.       | revidiert, revised                         | u. a.   | unter anderem, und andere                           |
| S.         | Seite                                      | Übers.  | Übersetzer(in), Übersetzung                         |
| SA         | Sturmabteilung                             | übers.  | übersetzt                                           |
| schweizer. | schweizerisch                              | Univ.   | Universität, University                             |
| SED        | Sozialistische Einheitspartei Deutschlands | u. ö.   | und öfter                                           |
| sog.       | sogenannt                                  | urspr.  | ursprünglich                                        |
| Sp.        | Spalte                                     | USPD    | Unabhängige Sozialdemokratische Partei Deutschlands |
| SPD        | Sozialdemokratische Partei Deutschlands    | v.      | von                                                 |
| SPÖ        | Sozialdemokratische Partei Österreichs     | v. d.   | vor dem, vor der                                    |
| SS         | Schutzstaffel                              | verb.   | verbessert                                          |
| St.        | Sankt                                      | verh.   | verheiratet                                         |
| Suppl.     | Supplement                                 | verm.   | vermehrt                                            |
| TH         | Technische Hochschule                      | veröff. | veröffentlicht                                      |
| Tl., Tle.  | Teil, Teile                                | verw.   | verwitwet                                           |
| trans.     | translation, translated                    | vgl.    | vergleiche                                          |
| Tsd.       | Tausend                                    | vorm.   | vormals                                             |
|            |                                            | z. B.   | zum Beispiel                                        |
|            |                                            | z. T.   | zum Teil                                            |
